# Supplementary material for: Lactococcus lactis NCDO2118 exerts visceral antinociceptive properties in rat via GABA production in the gastro-intestinal tract
Source: eLife. 2022 Jun 21;11:e77100. doi: 10.7554/eLife.77100 (PMC9213000; doi:10.7554/eLife.77100)
Supplement: Figure 1—source data 1. [file elife-77100-fig1-data1.xlsx]

## Sheet: Figures 1A and 1B
	Data for Figure 1A									Data for Figure 1B
	Strain	NCDO 2118		NCDO 2118		NCDO 2727		NCDO 2727		Strain	NCDO 2118		NCDO 2118		NCDO 2727		NCDO 2727
	Time (h)	GABA mM	Time (h)	GABA mM	Time (h)	GABA mM	Time (h)	GABA mM		Time (h)	X g/L	Time (h)	X g/L	Time (h)		Time (h)	X g/L
	0	0	0	0	0	0	0	0.0317826		0	0.1077	0	0.0879	0	0.1008	0	0.1191
	0.5	0	0.5	0	0.5	0.035	0.5	0.0374029		0.5	0.1074	0.5	0.0804	0.5	0.1083	0.5	0.0999
	1	0	1	0	1	0.0352873	1	0.046		1	0.1194	1	0.0936	1	0.1062	1	0.1146
	1.5	0	1.5	0	1.5	0.0286666	1.5	0.0460485		1.5	0.1563	1.5	0.1236	1.5	0.1092	1.5	0.1239
	2	0	2	0	2	0.024774	2	0.0487198		2	0.2676	2	0.1668	2	0.126	2	0.1353
	2.5	0	2.5	0	2.5	0.0245059	2.5	0.0531956		2.5	0.3348	2.5	0.2748	2.5	0.1272	2.5	0.1581
	3	0.0268065	3	0.149718	3	0.0267981	3	0.0552461		3	0.534	3	0.3936	3	0.1485	3	0.18
	3.5	0.0274565	3.5	0.298631	3.5	0.0254447	3.5	0.0524032		3.5	0.66	3.5	0.492	3.5	0.1638	3.5	0.1932
	4	0	4	0.478938	4	0.0337591	4	0.0547759		4	0.732	4	0.63	4	0.1797	4	0.2316
	4.5	0	4.5	0.810835	4.5	0.0258811	4.5	0.0554649		4.5	0.834	4.5	0.759	4.5	0.1752	4.5	0.2652
	5	0	5	1.68707	5	0.0334383	5	0.0603967		5	0.957	5	0.873	5	0.1974	5	0.2862
	5.5	0	5.5	2.28047	5.5	0.0321232	5.5	0.0587076		5.5	1.017	5.5	1.137	5.5	0.231	5.5	0.2922
	6	0	6	2.62191	6	0.0391076	6	0.0544751		6	1.23	6	1.341	6	0.2526	6	0.3234
	6.5	0	6.5	2.76138	6.5	0.0331336	6.5	0.05201		6.5	1.422	6.5	1.563	6.5	0.2526	6.5	0.351
	7	0	7	2.27232	7	0.0417692	7	0.0522156		7	1.635	7	1.728	7	0.2424	7	0.369
	7.5	0.206253	7.5	2.54777	7.5	0.0454597	7.5	0.0511161		7.5	1.857	7.5	2.037	7.5	0.2994	7.5	0.405
	8	0.299446	8	2.43832	8	0.0465012	8	0.057057		8	1.959	8	2.085	8	0.27	8	0.492
	8.5	2.41763	8.5	3.8689	8.5	0.0298947	8.5	0.0522764		8.5	2.025	8.5	2.124	8.5	0.2928	8.5	0.465
	9	3.62295	9	6.246	9	0.0303859	9	0.0543269		9	1.899	9	2.169	9	0.2808	9	0.543
	9.5	5.08399	9.5	9.935	9.5	0.030234	9.5	0.0533941		9.5	1.896	9.5	2.031	9.5	0.2772	9.5	0.483
	10	6.30667	10	11.3448	10	0.0329723	10	0.052385		10	1.806	10	2.091	10	0.2892	10	0.51
	10.5	7.88082	10.5	13.2547	10.5	0.0324071	10.5	0.0535325		10.5	1.74	10.5	1.989	10.5	0.2934	10.5	0.534
	11	9.04519	11	14.2795	11	0.0303967	11	0.0542787		11	1.65	11	1.938	11	0.294	11	0.6
	11.5	10.1393	11.5	17.0837	11.5	0.0320265	11.5	0.0606066		11.5	1.626	11.5	1.803	11.5	0.3072	11.5	0.564
	23.5	27.7029	23.5	41.8722	24	0.138558	12	0.0577323		23.5	1.323	23.5	1.38	24	0.378	12	0.582
							12.5	0.0601753								12.5	0.594
							13	0.0934161								13	0.597
							25	0.220238								25	0.624
