# Supplementary material for: Lactococcus lactis NCDO2118 exerts visceral antinociceptive properties in rat via GABA production in the gastro-intestinal tract
Source: eLife. 2022 Jun 21;11:e77100. doi: 10.7554/eLife.77100 (PMC9213000; doi:10.7554/eLife.77100)
Supplement: Figure 3—source data 3. [file elife-77100-fig3-data3.xlsx]

## Sheet: Feuil1
Data for Figure 3-figure supplement 1
					NCDO 2118		NCDO 2118
Strain	NCDO 2118		NCDO 2118		DGAD		DGAD
Time (h)	GABA mM	Time (h)	X g/L	Time (h)	GABA mM	Time (h)	X g/L
0	0	0	0.1077	0	0	0	0.0767518
0.5	0	0.5	0.1074	0.5	0	0.5	0.0802648
1	0	1	0.1194	1	0	1	0.0981791
1.5	0	1.5	0.1563	1.5	0	1.5	0.123475
2	0	2	0.2676	2	0	2	0.156141
2.5	0	2.5	0.3348	2.5	0	2.5	0.206692
3	0.0268065	3	0.534	3	0	3	0.288377
3.5	0.0274565	3.5	0.66	3.5	0	3.5	0.402752
4	0	4	0.732	4	0	4	0.530799
4.5	0	4.5	0.834	4.5	0	4.5	0.640451
5	0	5	0.957	5	0	5	0.723208
5.5	0	5.5	1.017	5.5	0	5.5	0.789036
6	0	6	1.23	6	0	6	0.864139
6.5	0	6.5	1.422	6.5	0	6.5	0.972213
7	0	7	1.635	7	0	7	1.12793
7.5	0.206253	7.5	1.857	7.5	0	7.5	1.33856
8	0.299446	8	1.959	8	0.187443	8	1.55631
8.5	2.41763	8.5	2.025	8.5	0.170401	8.5	1.69514
9	3.62295	9	1.899	9	0.182829	9	1.71293
9.5	5.08399	9.5	1.896	9.5	0.175418	9.5	1.62406
10	6.30667	10	1.806	10	0.188275	10	1.458
10.5	7.88082	10.5	1.74	25	0.285955	25	1.002
11	9.04519	11	1.65
11.5	10.1393	11.5	1.626
23.5	27.7029	23.5	1.323
